# Supplementary material for: Asymmetric alkylation of dimethoxyphosphoryl-N-[1-(S)-α-methylbenzyl]acetamide enolates. Synthesis of both stereoisomers from the same source of chirality by changing the equivalents of LDA
Source: Royal Society of Chemistry journal article supplement (doi:10.1039/b416616g), 2005-01-01
Supplement: b416616g.pdf [file b416616g.pdf]

**Asymmetric alkylation of dimethoxyphosphoryl-*N*-[1-(*S*)- $\alpha$ -methylbenzyl]acetamide enolates. Synthesis of both stereoisomers from the same source of chirality changing the equivalents of LDA**

**Mario Ordóñez<sup>\*</sup>, Eugenio Hernández-Fernández,<sup>a</sup> Janet Xahuentitla,<sup>a</sup>  
and Carlos Cativiela<sup>b</sup>**

<sup>a</sup>*Centro de Investigaciones Químicas, Universidad Autónoma del Estado de Morelos  
Av. Universidad No. 1001, 62210 Cuernavaca, Mor., México.*

<sup>b</sup>*Department of Organic Chemistry, Universidad de Zaragoza, 50009 Zaragoza Spain.*

*Typical experimental procedure for the second alkylation of 3.* To a solution of the  $\beta$ -phosphonoamide **3** (1 mmol) in dry THF at  $-78^\circ$  was added dropwise 2.0 or 2.5 equivalents of freshly prepared LDA from freshly titrated *n*-buthyllithium<sup>15</sup> and freshly distilled diisopropylamine in dry THF. The resulting solution was stirred for 1 h at  $-78^\circ$ . The benzyl bromide (1.1 equiv) was added with continuous stirring, and the mixture reaction was stirred at  $-78^\circ$  for 3-4 h and quenched with saturated aqueous NH<sub>4</sub>Cl solution. The product was extracted with ethyl acetate, the combined organic extracts were dried over anhydrous Na<sub>2</sub>SO<sub>4</sub>, filtered and concentrated in vacuum. The crude product was analyzed by NMR <sup>1</sup>H at 400 MHz and NMR <sup>31</sup>P at 200 MHz. The diastereomeric mixture was cleanly separated by column chromatography (hexane:ethyl acetate 70:30) to afford (*R,S*)-**4** as colorless oil (less polar) and (*S,S*)-**5** as white solid (more polar)

(*R,S*)-**4** as a colorless oil,  $[\alpha]_D = -100$  ( $c = 2.2$ , CHCl<sub>3</sub>). NMR <sup>1</sup>H (400 MHz, CDCl<sub>3</sub>)  $\delta$  1.27 (d,  $J = 16.0$  Hz, 3H, CH<sub>3</sub>C(Bn)P), 1.50 (d,  $J = 7.0$  Hz, 3H, CH<sub>3</sub>CHPh), 2.88 (dd,  $J = 13.6, 10.0$  Hz, 1H, CH<sub>2</sub>Ph), 3.35 (dd,  $J = 13.6, 10.0$  Hz, 1H, CH<sub>2</sub>Ph), 3.78 (d,  $J = 10.8$  Hz, 3H, (CH<sub>3</sub>O)<sub>2</sub>P), 3.82 (d,  $J = 10.8$  Hz, 3H, (CH<sub>3</sub>O)<sub>2</sub>P), 5.11 (q,  $J = 7.0$  Hz, 1H, CH(CH<sub>3</sub>)Ph), 6.88-6.90 (m, 2H, H<sub>arom</sub>), 7.01-7.17 (m, 3H, H<sub>arom</sub>), 7.22-7.37 (m, 5H, H<sub>arom</sub>). <sup>13</sup>C NMR (100 MHz, CDCl<sub>3</sub>)  $\delta$  16.8 (CH<sub>3</sub>C(Bn)P), 22.0 (CH<sub>3</sub>CHPh), 41.0 (CH<sub>2</sub>Ph), 48.4 (d,  $J = 130.5$ , CCH<sub>3</sub>(Bn)P), 49.7 (CH(CH<sub>3</sub>)Ph), 53.7 (d,  $J = 7.6$  Hz, (CH<sub>3</sub>O)<sub>2</sub>P), 53.9 (d,  $J = 7.6$  Hz, (CH<sub>3</sub>O)<sub>2</sub>P), 126.7, 127.1, 127.6, 128.2, 128.9, 130.5, 135.4, 143.2, 168.3 C=O. <sup>31</sup>P NMR (200 MHz, CDCl<sub>3</sub>)  $\delta$  33.59. Anal. calcd. for C<sub>20</sub>H<sub>26</sub>NO<sub>4</sub>P: C, 63.99; H, 6.98; N, 3.73%; found C, 63.67; H, 7.05; N, 3.44%.

(*S,S*)-**5** as a white solid, M.p. 114-115 °C,  $[\alpha]_D = -11$  ( $c = 2.2$ , CHCl<sub>3</sub>). NMR <sup>1</sup>H (400 MHz, CDCl<sub>3</sub>)  $\delta$  1.28 (d,  $J = 16.0$  Hz, 3H, CH<sub>3</sub>C(Bn)P), 1.52 (d,  $J = 7.2$  Hz, 3H, CH<sub>3</sub>CHPh), 2.94 (dd,  $J = 13.8, 10.2$  Hz, 1H, CH<sub>2</sub>Ph), 3.45 (dd,  $J = 13.8, 10.2$  Hz, 1H, CH<sub>2</sub>Ph), 3.50 (d,  $J = 10.8$  Hz, 3H,

<sup>\*</sup> Corresponding author. E-mail: palacios@buzon.uaem.mx

(CH<sub>3</sub>O)<sub>2</sub>P), 3.80 (d, J = 10.8 Hz, 3H, (CH<sub>3</sub>O)<sub>2</sub>P), 5.12 (q, J = 7.2 Hz, 1H, CH(CH<sub>3</sub>)Ph), 7.15-7.17 (m, 2H, H<sub>arom</sub>), 7.21-7.27 (m, 4H, H<sub>arom</sub>), 7.30-7.34 (m, 4H, H<sub>arom</sub>) <sup>13</sup>C NMR (100 MHz, CDCl<sub>3</sub>) δ 17.0 (CH<sub>3</sub>C(Bn)P), 22.2 (CH<sub>3</sub>CHPh), 41.0 (CH<sub>2</sub>Ph), 48.5 (d, J = 130.6, CCH<sub>3</sub>(Bn)P), 49.5 (CH<sub>3</sub>CHPh), 53.6 (d, J = 7.6 Hz, (CH<sub>3</sub>O)<sub>2</sub>P), 53.7 (d, J = 7.6 Hz, (CH<sub>3</sub>O)<sub>2</sub>P), 126.4, 127.3, 127.4, 128.3, 128.8, 130.5, 135.4, 143.5, 168.2 C=O. <sup>31</sup>P NMR (200 MHz, CDCl<sub>3</sub>) δ 33.59. Anal. calcd. for C<sub>20</sub>H<sub>26</sub>NO<sub>4</sub>P: C, 63.99; H, 6.98; N, 3.73%; found C, 63.59; H, 6.95; N, 3.57%.

X-ray crystal data of (*S,S*)-**5** were collected at 298 K using a Bruker APEX CCD instrument (Mo K $\alpha$  radiation,  $\lambda = 0.71073$  Å). The SHELXTL v. 6.1 program package was used for structure solution and refinement. The structure was solved by direct methods and refined by full-matrix least squares procedures. All non-hydrogen atoms were refined anisotropically. (*S,S*)-**5**: C<sub>20</sub>H<sub>34</sub>NO<sub>4</sub>P, *M* = 375.39, monoclinic space group P3(1)c, *a* = 11.172(4), *b* = 11.172(4), *c* = 13.401(7) Å,  $\beta = 90^\circ$ , *V* = 1448.4(10) Å<sup>3</sup>, *Z* = 3, *D*<sub>c</sub> = 1.291 g cm<sup>-3</sup>, 5242 reflections measured, 3277 unique (*R*<sub>int</sub> = 0.1165) which were used in all calculations, final *R* values were 0.0761 [*F* > 4 $\sigma$ (*F*)] and 0.0772 (all data).

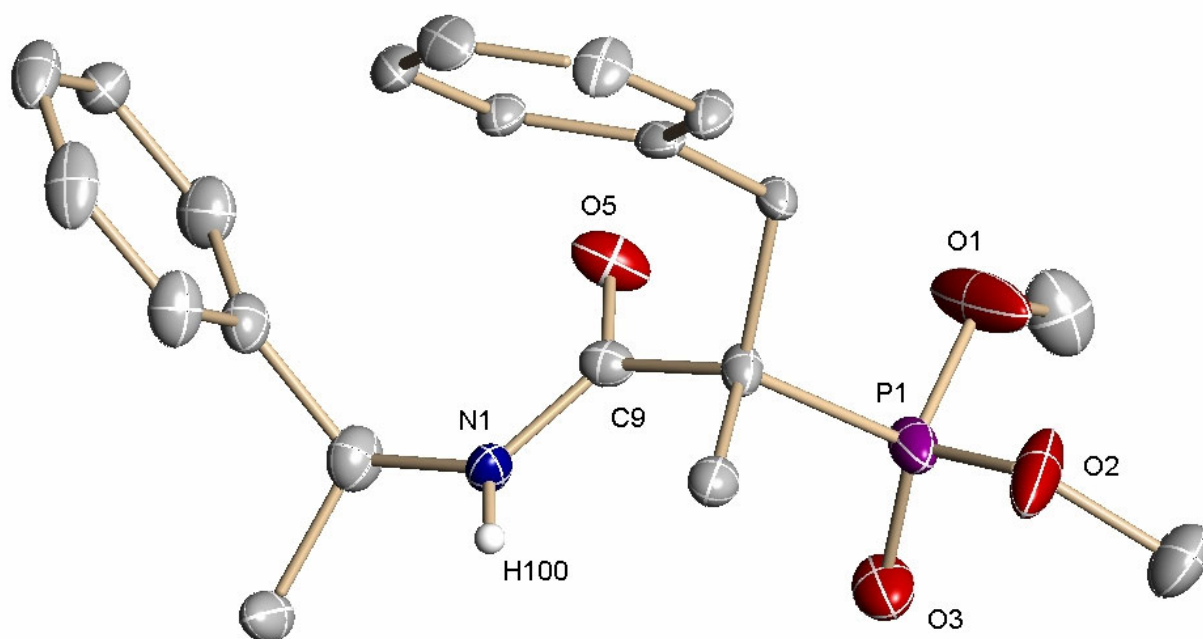

**Figure 1.** X-Ray crystal structure of (*S,S*)-**5**.

15. E. Juaristi, A. Martínez-Richa, A. García-Rivera, and J. S. Cruz-Sánchez, *J. Org. Chem.* **1983**, *48*, 2603.
